# Supplementary material for: Safety and efficacy of herbal medicine for acute intracerebral hemorrhage (CRRICH): a multicentre randomised controlled trial
Source: PubMed Central journal article supplement — BMJ Open. 2019 May 9;9(5):e024932. doi: 10.1136/bmjopen-2018-024932 (PMC6528012; doi:10.1136/bmjopen-2018-024932), 2019-05-09
Supplement: bmjopen-2018-024932supp001.pdf [file bmjopen-2018-024932supp001.pdf]

## Supplemental Material

**S1 Table: study inclusion and exclusion criteria**

---

Study inclusion and exclusion criteria

---

Inclusion Criteria:

- ages eligible for Study: 18 years or older
- genders eligible for Study: Both
- AICH confirmed by craniocerebral CT scan
- within 6 hours after the onset of symptom
- GCS $\geq$ 6
- sign the informed consent form

Exclusion Criteria:

- secondary intracerebral hemorrhage resulting from trauma, brain tumor, blood diseases, arteriovenous malformation or aneurysm, etc;
- patients with severe heart, liver or kidney disease.
- Intolerance to herbal medicine,
- patients with allergies
- patients planning a surgical evacuation of hematoma with severe cerebral hernia at super-early stage
- patients with poor compliance

---

TCM, Chinese Medicine. AICH, acute intracerebral hemorrhage. CT, computed tomography; GCS, Glasgow coma scale.

**S2 Table : Full list of Principle investigators and study centers**

| Centre NO. | Principle Investigator                    | Centre address, zip code                                                                | Number of patients randomized |
|------------|-------------------------------------------|-----------------------------------------------------------------------------------------|-------------------------------|
| 1          | Zhangyong Xia, Rui Zhang, Guangzeng Li    | Liaocheng People's Hospital, Liaocheng, Shandong Province, China, 252000                | 39                            |
| 2          | Guangsheng Chen, Bochang Lin, Weiming Zhu | Boluo County People's Hospital, Huizhou, Guangdong, China, 514610                       | 32                            |
| 3          | Qianshan Zhao, Richao Chen, Yongtong He   | Jiangmen Wuyi Traditional Chinese Medicine Hospital, Jiangmen, Guangdong, China, 529000 | 9                             |
| 4          | Jiexia Li, Xiaomei Huang, Mengxin Huang   | The hospital of Chinese Medicine of Conghua City, Conghua, Guangdong, China, 5109000    | 27                            |

|    |                                            |                                                                                                     |    |
|----|--------------------------------------------|-----------------------------------------------------------------------------------------------------|----|
| 5  | Chaojun Chen, Jianfang Hu, Peiqun Yang     | Guangzhou Hospital of Integrated traditional and west medicine, Guangzhou, Guangdong, China, 510800 | 2  |
| 6  | Yongbo Zhang, Quanliang Wang, Xiulan Huang | Shouguang City People's Hospital, Shouguang, Shandong, China, 262700                                | 21 |
| 7  | Gan Huang, Lianying Li, Yanchun Li         | Yangjiang Hospital of Traditional Chinese Medicine, Yangjiang, Guangdong, China, 529500             | 13 |
| 8  | Kaiyun Zhu, Ningping Liu, Yinghong Zhang   | Panyu Hospital of Chinese Medicine Guangzhou, Guangdong, China, 511400                              | 1  |
| 9  | Saihua Luo ,Zai Liang, Bing Qiu            | Lianjiang People's hospital, Lianjiang, Guangdong, China, 524400                                    | 19 |
| 10 | Guanghai Tang, Kai Zhao, Guang Yang        | Shenyang No.2 traditional Chinese medical hospital, Shenyang, Liaoning, China, 110000               | 54 |
| 11 | Jianbin Zhong, Simin Zhong, Sijun Zhang    | Boji-affiliated Hospital of Sun Yat-sen University, zengcheng, Guangdong, China, 511300             | 42 |
| 12 | Jianwen Guo, Liling Zeng, Jing Wang        | Guangdong Provincial Hospital of Chinese Medicine, Guangzhou, Guangdong, China, 510120              | 42 |
| 13 | Yue Wang, Wenjun Liu, Jing Zuo             | Zhongshan Hospital of Hubei Province, Wuhan, Hubei, China,430032                                    | 9  |
| 14 | Tao Huang, Ronming Lin, Qixin Zhang        | Guangzhou Charity Hospital, Guangzhou, Guangdong, China,510000                                      | 14 |

**S1 Fig: Study design**

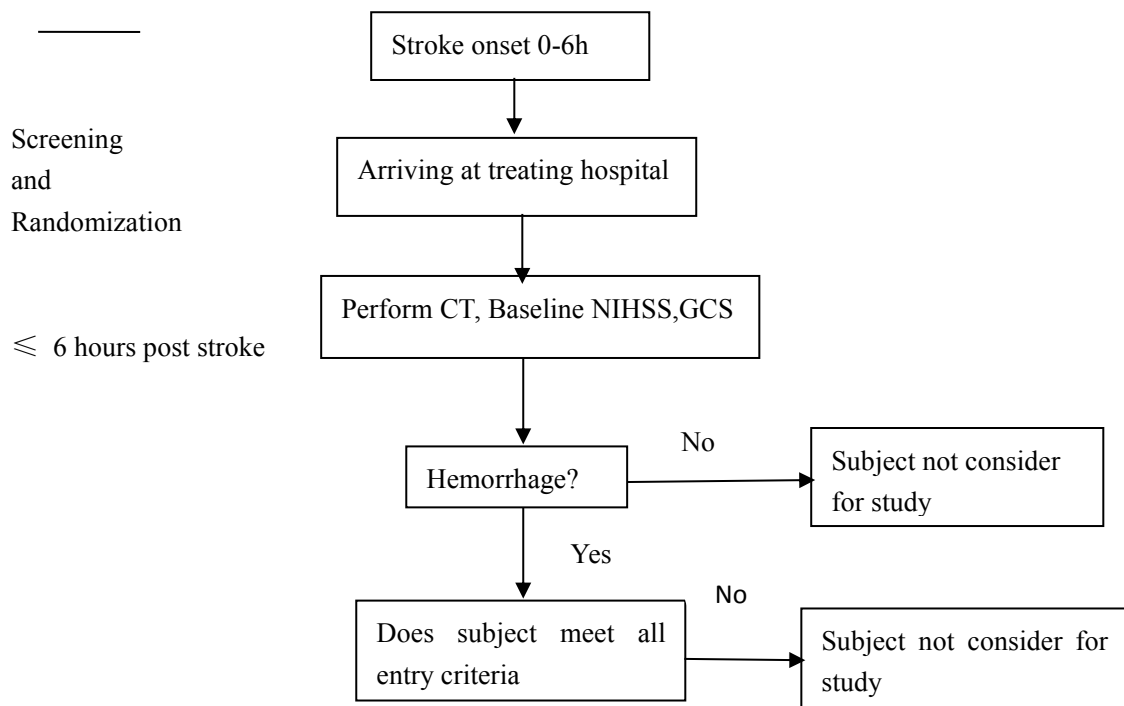

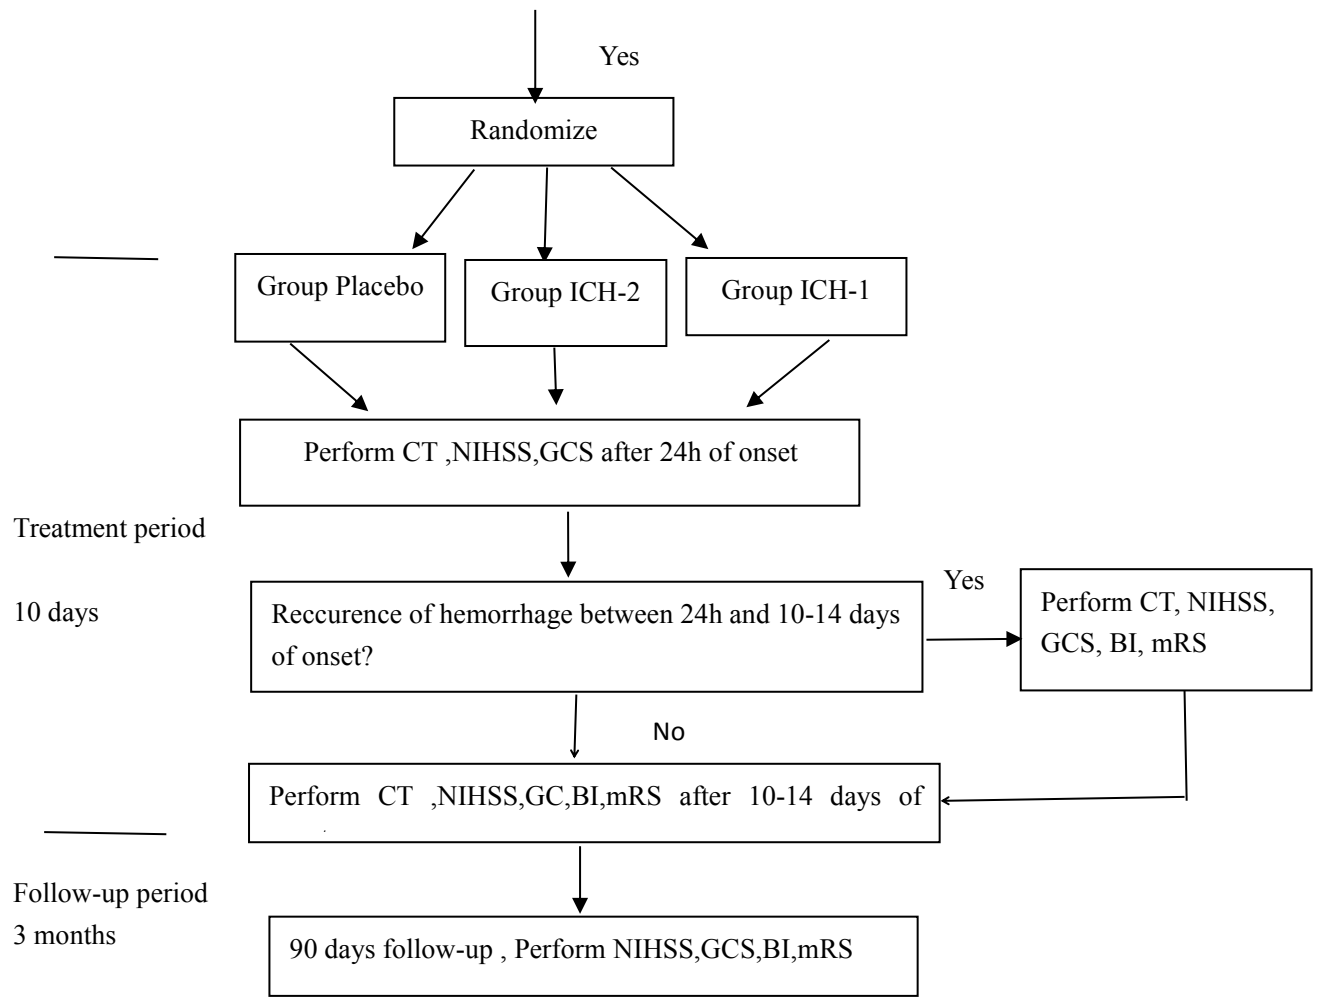

S1 Fig. Study design diagram. Subjects who had suffered hypertensive intracerebral hemorrhage were randomized to receive placebo, ICH-1, ICH-2 in a 1:1:1 ratio within 6 hours following the stroke onset. The trial consisted of a screening period (up to 6 hours), followed by a randomized treatment period (up to 2 weeks treatment period), ending with a 3-month efficacy follow-up period (where subjects were allowed to undergo treatment in accordance with standard clinical practice). CT, computed tomography; CTA, computed tomography angiography; NIHSS, National Institutes of Health Stroke Scale; mRS, modified Rankin Scale; BI, Barthel Index; GCS, Glasgow coma scale.

**S3 Table : Groups and Interventions**

| Groups             | Interventions                                                                                                   | Direction                                              |
|--------------------|-----------------------------------------------------------------------------------------------------------------|--------------------------------------------------------|
| ICH-1              | 8 herbal, including 2 herbals of RBS ( <i>Hirudo nipponica</i> Whitman and <i>Tabanus bivittatus</i> Matsumura) | one dose, bid, by oral or nasogastric tube for 10 days |
| ICH-2              | 6 herbals (removed the 2 herbals of RBS from the ICH-1 formula)                                                 | one dose, bid, by oral or nasogastric tube for 10 days |
| Placebo Comparator | placebo herbal medicine (with dextrin, farina and so on)                                                        | one dose, bid, by oral or nasogastric tube for 10 days |

\*RBS, removing blood stasis.

**S4 Table: Composition of the ICH-1 formula**

| TCM ID                               | Plant/animal parts included | Condition | dosage(gram) | dosage form |
|--------------------------------------|-----------------------------|-----------|--------------|-------------|
| Hirudo nipponica Whitman             | entire body                 | dry       | 1.0          | granules    |
| Tabanus bivittatus Matsumura         | entire body                 | dry       | 1.0          | granules    |
| Rheum officinale Baill               | rhizome                     | dry       | 1.5          | granules    |
| Typha angustifolia L                 | pollen                      | dry       | 1.5          | granules    |
| Trichosanthes kirilowii Maxim.       | seed                        | dry       | 1.5          | granules    |
| Panax notoginseng (Burk.) F. H. Chen | rhizome                     | dry       | 1.0          | granules    |
| Acorus tatarinowii Schott            | rhizome                     | dry       | 1.0          | granules    |
| Chinemys reevesii (Gray)             | shell                       | dry       | 1.5          | granules    |

**S5 Table : All primary, secondary and safety endpoints**

|                                                                                                          |
|----------------------------------------------------------------------------------------------------------|
| <b>Primary</b>                                                                                           |
| Hematoma enlargement:the percent change in the volume of hematoma at 24 hours,on 10-14 <sup>th</sup> day |
| <b>Secondary</b>                                                                                         |
| Between-group differences in the NIHSS at 3 months                                                       |
| Mortality on the 10 <sup>th</sup> -14 <sup>th</sup> day, 3 months                                        |
| Poor prognosis popularly as defined by mRS score $\geq$ 5 at 3 months                                    |
| Adverse events                                                                                           |

NIHSS, National Institutes of Health Stroke Scale; mRS, modified Rankin Scale.
